# Supplementary material for: CDR3 Variants of the TXB2 Shuttle with Increased TfR1 Association Rate and Enhanced Brain Penetration
Source: MDPI journal article supplement (doi:10.3390/pharmaceutics15030739), 2023-02-23
Supplement: s1 [file s1]

Article

# CDR3 Variants of the TxB2 Shuttle with Increased TfR1 Association Rate and Enhanced Brain Penetration

Pawel Stocki <sup>1,†</sup>, Jaroslaw Szary <sup>1,†</sup>, Mykhaylo Demydchuk <sup>1</sup>, Leandra Northall <sup>1</sup>, Charlotte L. M. Rasmussen <sup>2</sup>, Diana Bahu Logan <sup>1</sup>, Aziz Gauhar <sup>1</sup>, Laura Thei <sup>1</sup>, Shu-Fen Coker <sup>1</sup>, Torben Moos <sup>2</sup>, Frank S. Walsh <sup>1</sup> and J. Lynn Rutkowski <sup>1,\*</sup>

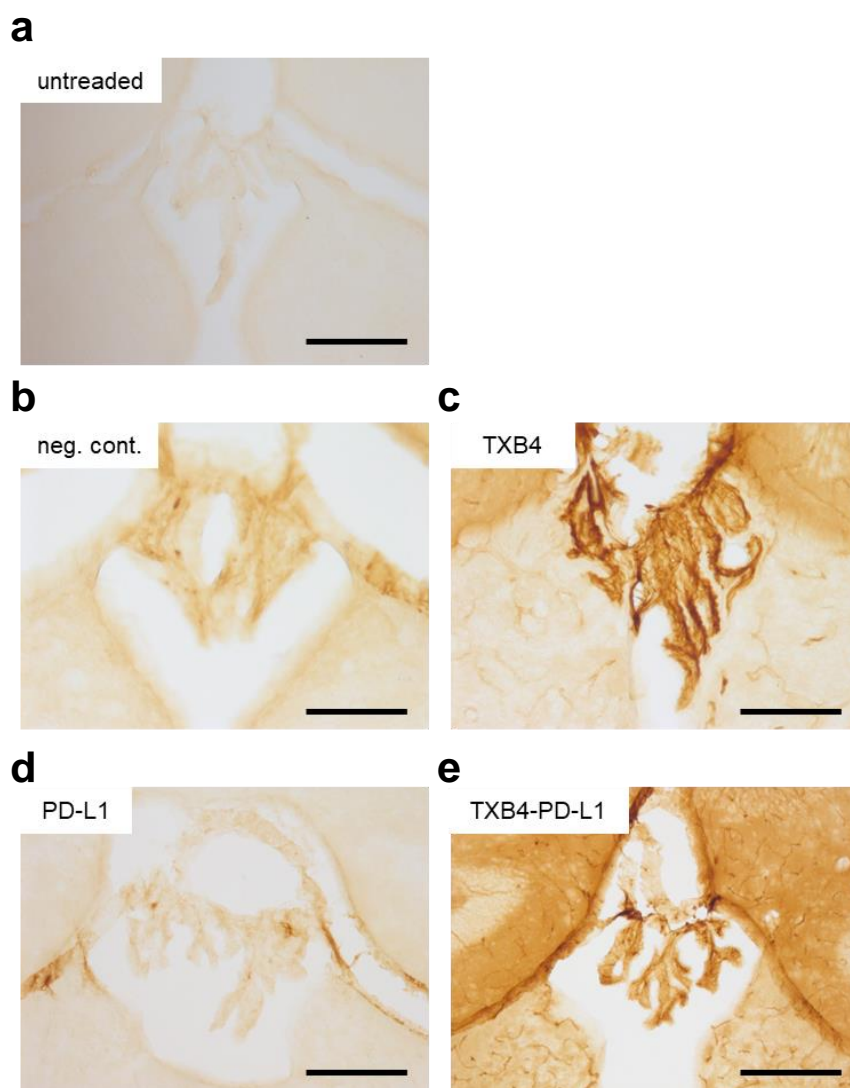

**Supplementary Figure S1.** IHC assessment of choroid plexus. (a) The untreated control was obtained from non-injected animals and served as a staining control. Mice were dosed with either (b) the negative control VNAR-hFc (neg. cont.), (c) TxB4, (d) PD-L1 antibody or (e) TxB4-PD-L1 at 25 nmol/kg, IV and brains were collected following cardiac perfusion 18 hrs post injection ( $n = 2$ ). Brain sections were analyzed for the presence of exogenous antibodies by IHC and images were collected from choroid plexus for comparison. Scale bars at 500  $\mu$ m.
